# Supplementary material for: A Critical Analysis of Atoh7 (Math5) mRNA Splicing in the Developing Mouse Retina
Source: PubMed Central journal article supplement (PMC2927423; doi:10.1371/journal.pone.0012315), 2010-08-24
Supplement: pone.0012315.s006.pdf [file pone.0012315.s006.pdf]

**Table S1. Oligonucleotide primers in this study**

| Name | Ori | Sequence (5' → 3')                     | Expt                  | Alternate names† |              |
|------|-----|----------------------------------------|-----------------------|------------------|--------------|
|      |     |                                        |                       | Sup. Fig. 2      | Sup. Table 2 |
| LP1  | S   | TCTACTGCAAGCTGTCCAAACGCTC              | RT-PCR                | 1                |              |
| LP2  | AS  | AACATACAGGCTGTGTTGGTAGCTG              | RT-PCR                | 2                |              |
| LP3  | AS  | GGTAGCTGCTCAGAACATAAACAAGTCACAT        | RT-PCR                | 3                |              |
| LP4  | AS  | GTTTCTCCACCTCCTGAATGACGCT              | RT-PCR, triplex PCR†  | 4                |              |
| LP5  | S   | GCCTCCCTATCTCCACTTCTCTTGTT             | RT-PCR, 3' RACE (pA1) | 5                |              |
| LP6  | S   | GTGGATGAAGTCGGCCTGCAA                  | RT-PCR                | 6                |              |
| LP7  | AS  | TTTCTCCCCTAAGACCCAAATGGC               | RT-PCR                | 7                |              |
| LP8  | S   | TCTCAGGCTTTCCAGAGAACTGGA               | RT-PCR, triplex PCR   |                  | 1            |
| LP9  | AS  | TTTGCAGGCCGACTTCATCCAC                 | RT-PCR                |                  | 2            |
| AP   | AS  | GGCCACGCGTCGACTAGTACTTTTTTTTTTTTTTTTTT | 3' RACE               |                  |              |
| UAP  | AS  | GGCCACGCGTCGACTAGTAC                   | 3' RACE               |                  |              |
| LP10 | S   | TCCCTATTGGGCGAAGTTGT                   | 3' RACE (pA1)         |                  |              |
| LP11 | S   | AGGGTGAAGTGCTTGCTGGT                   | 3' RACE (pA6)         |                  |              |
| LP12 | S   | GTTACAGGGCCTGCGAAATG                   | 3' RACE (pA6)         |                  |              |
| LP13 | S   | AAGCTGTCCAAGTACGAGACACTGC              | RT-PCR, triplex PCR   |                  |              |
| LP14 | S   | CCTTTTCTGCTTAATTCCTTCCCG               | triplex PCR           |                  |              |
| LP15 | S   | GGGTGCTAGGCTCCAG   GTTTC               | triplex PCR (Cb)*     |                  |              |

**Notes:**

Ori, orientation; S, sense; AS, antisense; AP, adapter primer; UAP, universal amplification primer

\*primer sequence spans Cb intron junction

†end-labeled with 6-carboxyfluorescein (6-FAM)

‡used by Kanadia and Cepko (2010)
