# Supplementary material for: A Critical Analysis of Atoh7 (Math5) mRNA Splicing in the Developing Mouse Retina
Source: PubMed Central journal article supplement (PMC2927423; doi:10.1371/journal.pone.0012315), 2010-08-24
Supplement: pone.0012315.s008.pdf [file pone.0012315.s008.pdf]

**Table S3. DNA sequence flanking deletions in RT-PCR products**

| No.                                                                          | 5' sequence                        | del     | 3' sequence                          |
|------------------------------------------------------------------------------|------------------------------------|---------|--------------------------------------|
| <b>from Kanadia and Cepko (2010)</b>                                         |                                    |         |                                      |
| ECO                                                                          | ... ACTGACTGCAC   GTGAGTCGCTCCGTC  | [ 639 ] | TGTTTTGTAG   GTTTCATGAGTGGACATC ...  |
| InC                                                                          | ... CCCTCCGGCGGGAGCT   CGCGGCGCGC  | [ 71 ]  | CGCGGCGCGCAGGCGTCTGGCGGCCAAC ...     |
| E12P20                                                                       | ... TCGCGGCGCGCCCCCGT   GCGCGGGCG  | [ 85 ]  | GCGCGAGCGGCGCCGCATGCAGGGGCTG ...     |
| 32                                                                           | ... TCGCGGCGCGCCCCCG   TCGCGGGCG   | [ 134 ] | TCGCGAGGTTGGTGCCGCAGTGGGGCCA ...     |
| 9                                                                            | ... GGCCCTCCGGCGGGAGCTCGC   GGC GC | [ 122 ] | GG   GGC TGAACACGGCGTTCGACCGGCTG ... |
| <b>from E14.5 retina RT-PCR (<math>\leq 2X</math> MasterAmp™, 40 cycles)</b> |                                    |         |                                      |
| 1                                                                            | ... AAGTCGGCCTGCAAACCCAC   GGCC    | [ 70 ]  | GGCCGGGCGGCTGGAGAGCGCGGCGCG ...      |
| 2*                                                                           | ... ATGAAGTCGGCCTGCAA   ACCCCACG   | [ 235 ] | CTGCAG   ATGGCGCTCAGCTACATCATCG ...  |
| <b>from RT-PCR of IVT RNA (<math>\leq 2X</math> MasterAmp™)</b>              |                                    |         |                                      |
| 3                                                                            | ... CGTGGATGAAGTCGGCCTG   CAAACC   | [ 746 ] | TAAATCC TAGCGTCATTCAGGAGGTGGA ...    |
| 4                                                                            | ... GAAAGCTTTCTAT   CCCC GACCC     | [ 605 ] | CCCC TACCTCCCTTTCCGGGTGCTAG ...      |
| 5                                                                            | ... CTCCGGCGGGAGCTC   GCGGCGCGC    | [ 106 ] | GCGGCGCGCATGCAGGGGCTGAACAC ...       |
| 6                                                                            | ... CTCCGGCGGGAGCTC   GCGGCGCGC    | [ 106 ] | GCGGCGCGCATGCAGGGGCTGAACAC ...       |
| 7                                                                            | ... CTCCGGCGGGAGCTC   GCGGCGCGC    | [ 70 ]  | GCGGCGCGCAGGCGTCTGGCGGCCAA ...       |
| 8                                                                            | ... CGCGCCCCCGT GCGCGG   GCGCAGCC  | [ 85 ]  | GCGCGA   GCGGC GCCGCATGCAGGGGCT ...  |
| 9                                                                            | ... CTCGCGGCGCGCCCCCG   TCGCGGGC   | [ 103 ] | TCGAGGGCTGAACACGGCGTTCGACC ...       |
| 10                                                                           | ... CCCACGGCCCTCCG GCGG   GAGCTCG  | [ 110 ] | GCGC   GAGCGGCGCCGCATGCAGGGGCT ...   |
| 11                                                                           | ... CCCTCCGGCGGGAGCT   CGCGGCGCGC  | [ 71 ]  | CGCGGCGCGCAGGCGTCTGGCGGCCAA ...      |
| 12                                                                           | ... TGCAAACCCACGGCCCT   CCGGC GG   | [ 155 ] | CCGGC TCGCAGGGTGGTGCCGCAGTG ...      |

Spurious RT-PCR products are numbered to match Figure 5. The highlighted text shows areas of micro-homology, which can promote RT template switching. The size of the deletion [bp] and breakpoints (|) are indicated.

\*Product is likely due to mis-priming of LP6.
