# Supplementary material for: A Critical Analysis of Atoh7 (Math5) mRNA Splicing in the Developing Mouse Retina
Source: PLoS One. 2010 Aug 24;5(8):e12315. doi: 10.1371/journal.pone.0012315 (PMC2927423; doi:10.1371/journal.pone.0012315)
Supplement: Table S2 — PCR conditions in this study. (0.03 MB PDF) [file pone.0012315.s007.pdf]

Table S2. PCR conditions in this study

| Experiment      | Primers |      | # cycles† | Product                  | Size        | Figure     |
|-----------------|---------|------|-----------|--------------------------|-------------|------------|
|                 | FOR     | REV  |           |                          |             |            |
| RT-PCR (gPCR)   | LP8     | LP4  | 35§       | Math5 full length<br>ECO | 1087<br>448 | 3a, 3b, 4b |
| RT-PCR (gPCR)   | LP6     | LP7  | 35§       |                          | 486         | 3c, 3d, 4c |
| RT-PCR          | LP13    | LP4  | 35        | unspliced<br>Cb splice   | 567<br>368  | Suppl 3d   |
| RT-PCR          | LP15    | LP4* | 33        | Cb splice                | 228         | Suppl 3e   |
| 3' RACE pA1     | LP5     | UAP  | 15        | initial RACE             | >591‡       | 2d         |
|                 | LP10    | UAP  | 20        | nested RACE              | >236‡       |            |
| 3' RACE pA6     | LP11    | UAP  | 15        | initial RACE             | >379‡       | 2d         |
|                 | LP12    | UAP  | 20        | nested RACE              | >342‡       |            |
| Triplex RT-PCR¶ | LP8     | LP4* | 33        | unspliced                | 567         | 6b, 6c     |
|                 | LP13    |      |           | ECO                      | 448         |            |
| Triplex RT-PCR¶ | LP8     | LP4* | 33        | unspliced                | 301         | 6b, 6c     |
|                 | LP14    |      | 33        | ECO                      | 448         |            |
| Triplex RT-PCR¶ | LP14    | LP4* | 33        | unspliced                | 301         | Suppl 3e   |
|                 | LP15    |      |           | Cb splice                | 228         |            |

Notes:

\* End-labeled with 6-FAM (carboxyfluorescein)

† All PCRs had an initial denaturation step (94°C x 3 min); followed by # cycles of 94°C x 30 sec denaturation, 57°C x 45 sec annealing, and 72°C x 60-70 sec extension; plus a final extension step (72°C x 7 min)

§ To generate deletion products, 40 cycles were used in these reactions, with basic *Taq* polymerase (Invitrogen cat. 10342)

‡ Products include a variable polyA tract

¶ Triplex PCRs utilized 3 primers, with 2 FOR primers at 0.1 µM each and 1 REV primer at 0.2 µM.
